# Supplementary material
Source: PubMed Central journal article supplement (PMC5992891)

Balaratnasingam, C., Messinger, J. D., Sloan, K. R., Yannuzzi, L. A., Freund, K. B., Curcio, C. A. Histology and optical coherence tomography correlations in drusenoid pigment epithelium detachment in age-related macular degeneration. *Ophthalmology*.

**Supplementary Figure 2. Computer-generated maps of the D-PED surface in the *Index* case.** The D-PED is represented in blue by a triangulated, piecewise-planar surface. Red dots indicate location of intraretinal RPE. Yellow dots indicate location of vitelliform material. Data gathered using a custom Java plugin for FIJI included tracings of 28 stepped histological sections through the dome of the D-PED, along with locations of interesting features. Features were sampled at pre-determined locations in each section as described in the main text. A separate custom Java program reconstructed a 3D model of the D-PED surface along with markers identifying and locating the features. The complete 3D model was created and viewed using OpenSCAD ([www.openscad.org](http://www.openscad.org)). **A.** Top-down view. **B.** Three-quarter view.

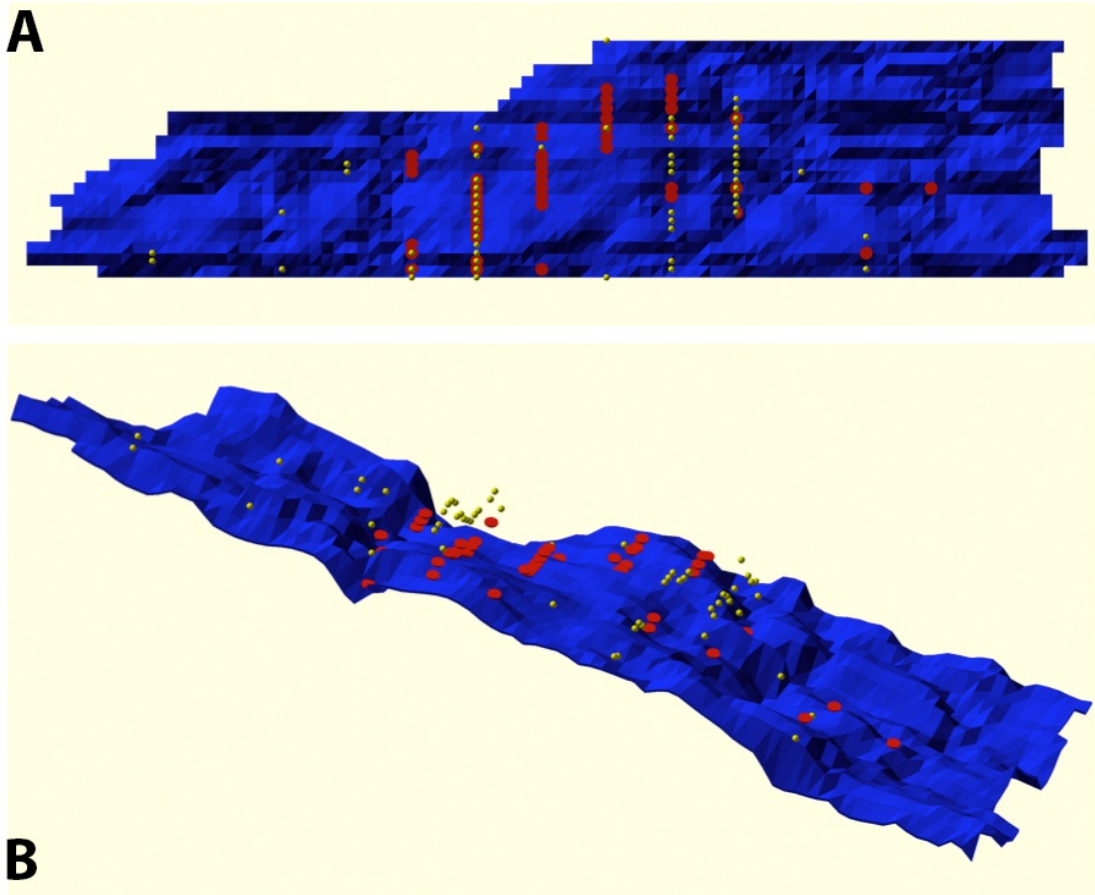

Supplement: NIHMS840253-supplement-2.pdf [file NIHMS840253-supplement-2.pdf]
