# Supplementary material
Source: PubMed Central journal article supplement (PMC5992891)

Balaratnasingam, C., Messinger, J. D., Sloan, K. R., Yannuzzi, L. A., Freund, K. B., Curcio, C. A. Histology and optical coherence tomography correlations in drusenoid pigment epithelium detachment in age-related macular degeneration. *Ophthalmology*.

**Supplementary Figure 3. Clinicopathologic correlation of a clinically stable drusenoid pigment epithelial detachment in Case 2.**<sup>17</sup> **A.** A large subfoveal druse complex surrounded by soft drusen was first seen in a 42-year-old woman in 1973. **B.** *Ex vivo color* imaging with epi- and trans-illumination at death 22 years later indicated that the lesion had been stable. Green lines indicate levels of histologic sections in panels C and D. **C.** The RPE layer is pigmented, continuous, variable in thickness, and overall thin. The druse interior is variegated in staining and contains cells with sparse melanosomes. Black arrowheads, BrM. **D.** A granule aggregate is apparent (pink arrowhead). Air bubbles in the epoxy resin artifactually deformed the bacillary layer (asterisk). ONL = outer nuclear layer; IS = inner segments; OS = outer segments; RPE = retinal pigment epithelium; ChC = choriocapillaris

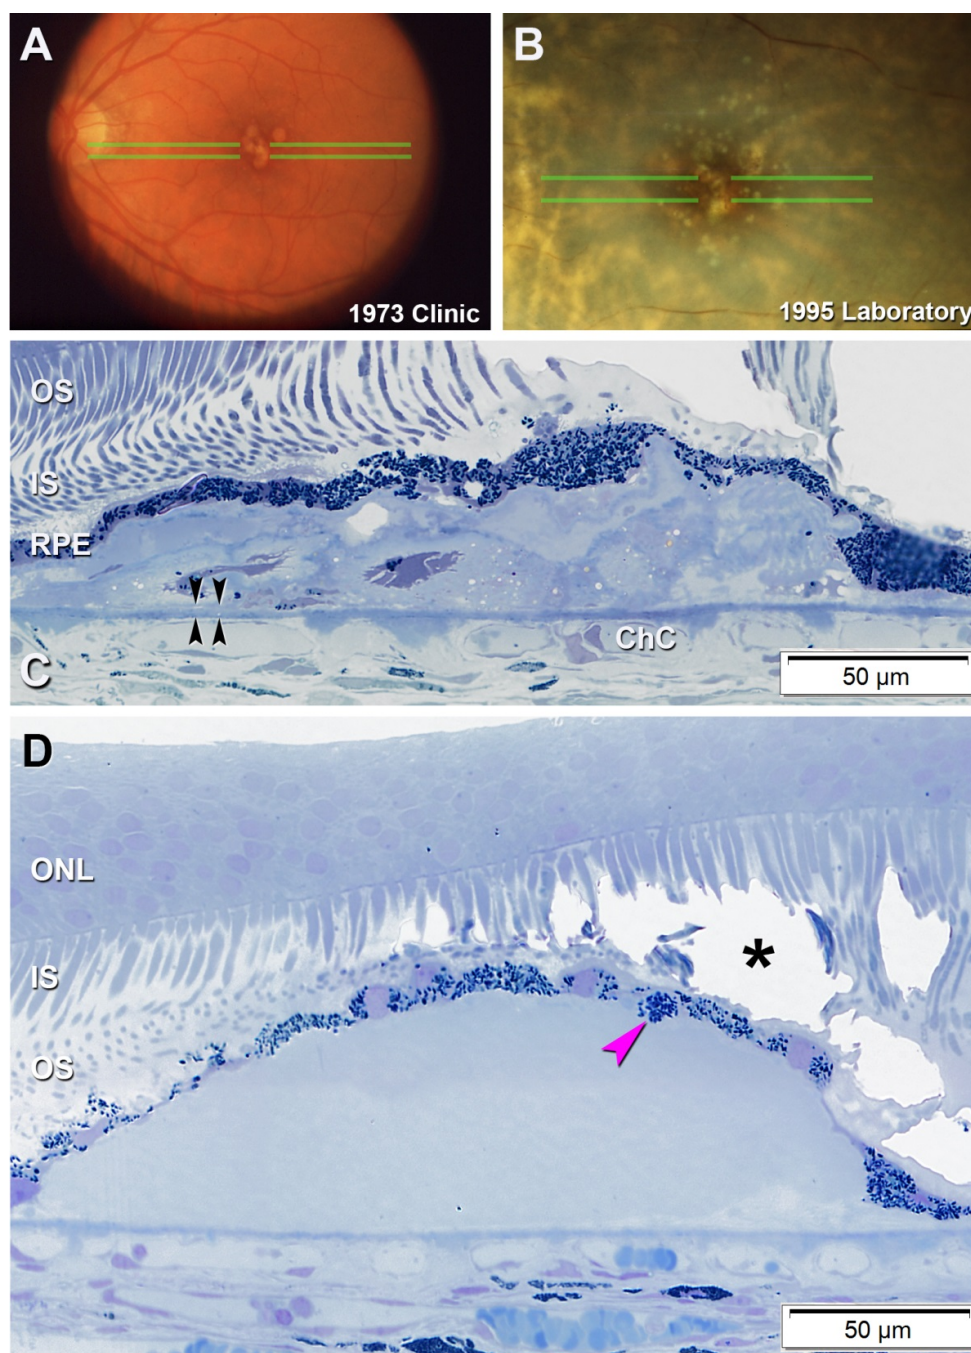

Supplement: NIHMS840253-supplement-3.pdf [file NIHMS840253-supplement-3.pdf]
