# Supplementary material
Source: PubMed Central journal article supplement (PMC5992891)

Balaratnasingam, C., Messinger, J. D., Sloan, K. R., Yannuzzi, L. A., Freund, K. B., Curcio, C. A. Histology and optical coherence tomography correlations in drusenoid pigment epithelium detachment in age-related macular degeneration. *Ophthalmology*.

**Supplementary Video 1. *Ex vivo* spectral domain optical coherence tomogram of a drusenoid pigment epithelial detachment in the *Index* case.** Preserved eye was placed in a tissue holder inside a Spectralis (Heidelberg Engineering, Heidelberg Germany) as described<sup>15</sup>. Volume was created using the Spectralis software (v. 2.0, 2011)

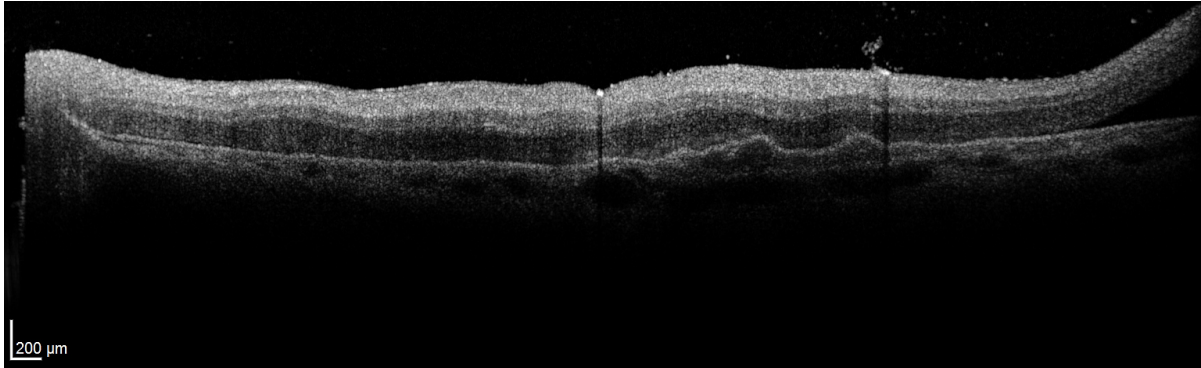

Supplement: NIHMS840253-supplement-5.pdf [file NIHMS840253-supplement-5.pdf]
